# Supplementary material for: Data-Driven Approaches for Spatio-Temporal Analysis: A Survey of the State-of-the-Arts
Source: Springer Nature journal article supplement (doi:10.1007/s11390-020-9349-0), 2020-05-01

# **Data-Driven Approaches for Spatio-temporal Analysis: A Survey of the State-of-the-Arts**

**Authors:**

**Monidipa Das<sup>1</sup> and Soumya K. Ghosh<sup>2</sup>**

Das M, Ghosh SK. Data-driven approaches for spatio-temporal analysis: A survey of the state-of-the-arts. JOURNAL OF COMPUTER SCIENCE AND TECHNOLOGY 35(3): 665–696 May 2020.  
DOI 10.1007/s11390-020-9349-0

# Highlights

- This survey provides a *structured* and *systematic* overview of the state-of-the-art *spatio-temporal (ST) data mining techniques* and their *applications* in various domains.
- The reviewed research articles are considered from *thirteen application areas* and the various data-driven approaches are categorized into *traditional/pure statistical, computational Intelligence-based, and deep-learning-based techniques*.
- More than *three hundred* papers, mostly *from 2009 to 2018* are studied to provide a comprehensive review of the present trend of research on *six major families* of ST data analysis
- The survey also provides promising *directions of work in future*.

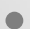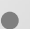

# Survey Organization

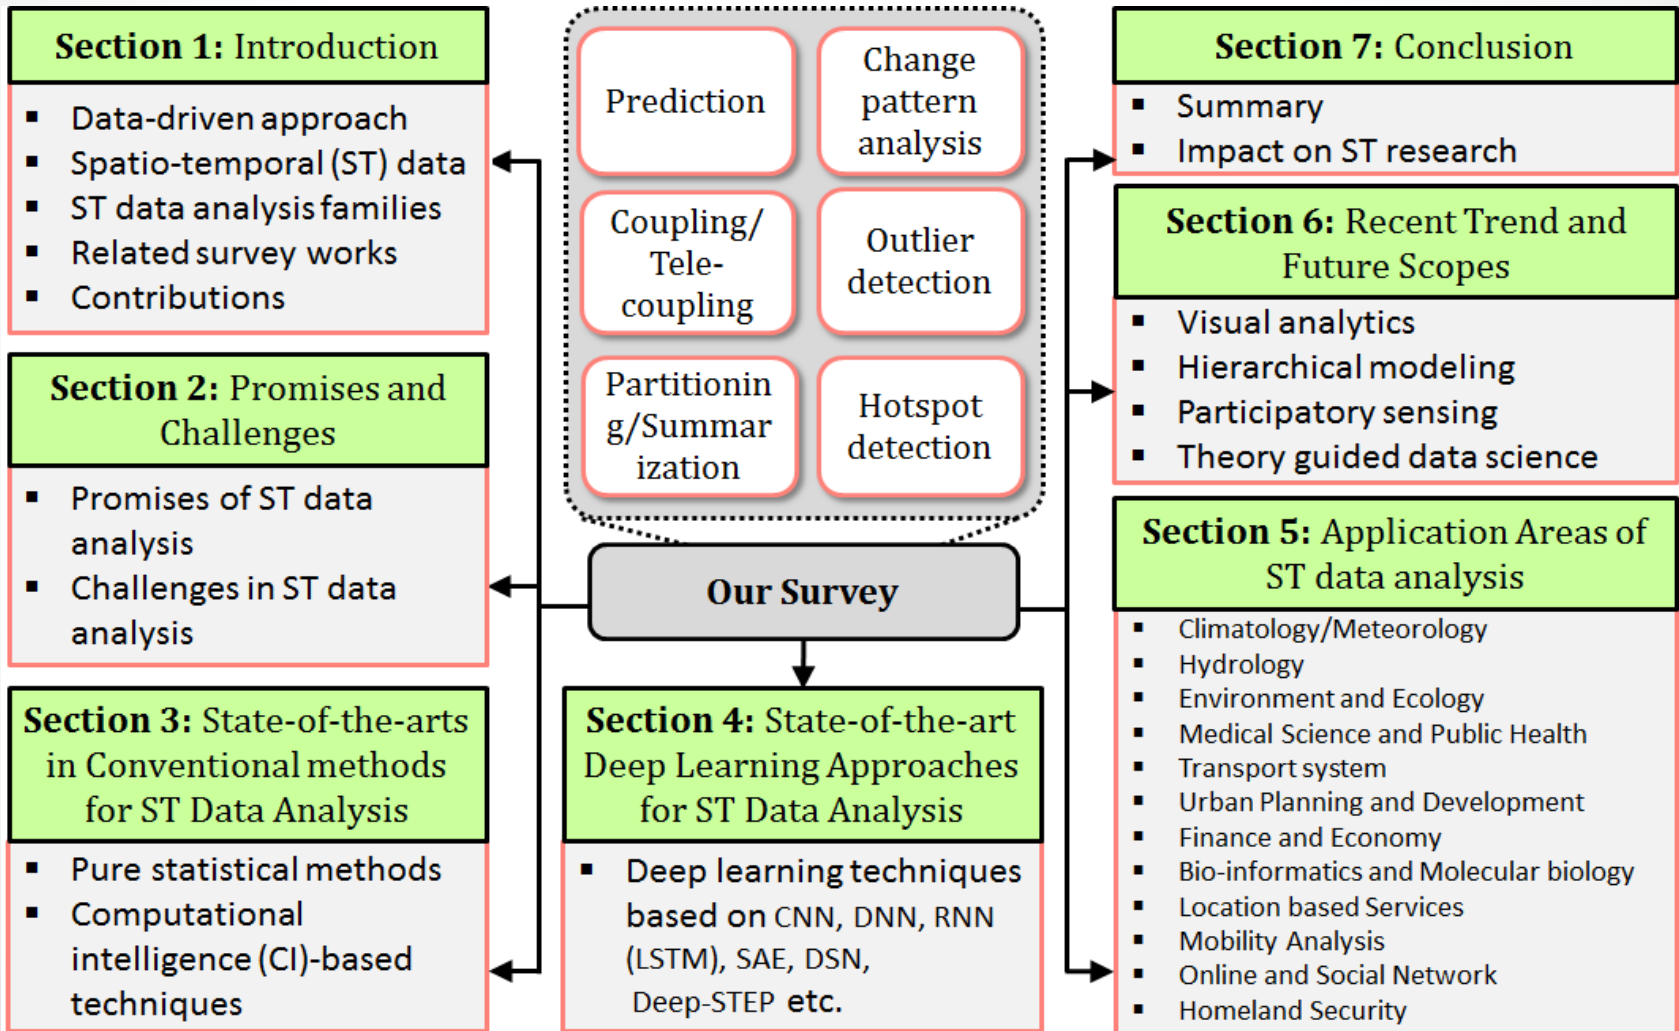

# Key Contributions

- Focusing on the state-of-the-art techniques from both *analysis family* and *application domain* perspectives.
- *Categorizing* the existing techniques into *hierarchical form*
- Providing extensive coverage of *computational intelligence based* and *deep learning based* techniques
- Concentrating more on the research made in the *recent years* than the work done in the last decades

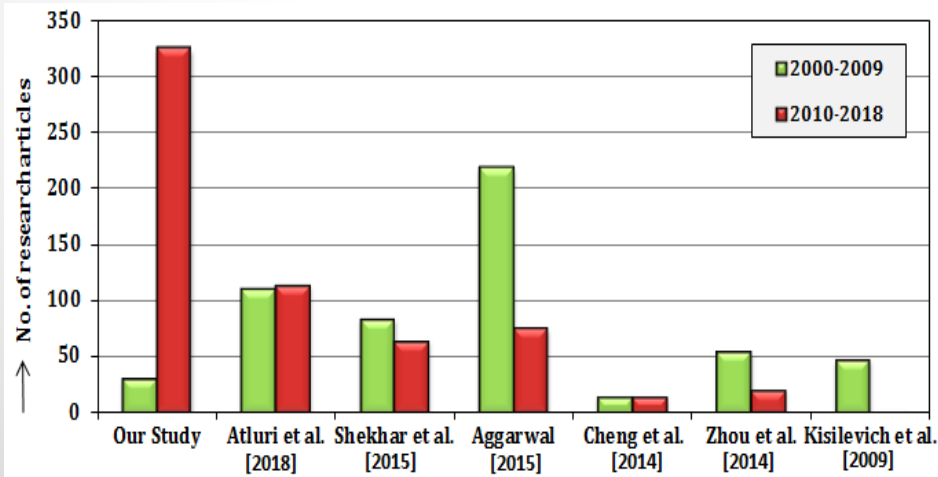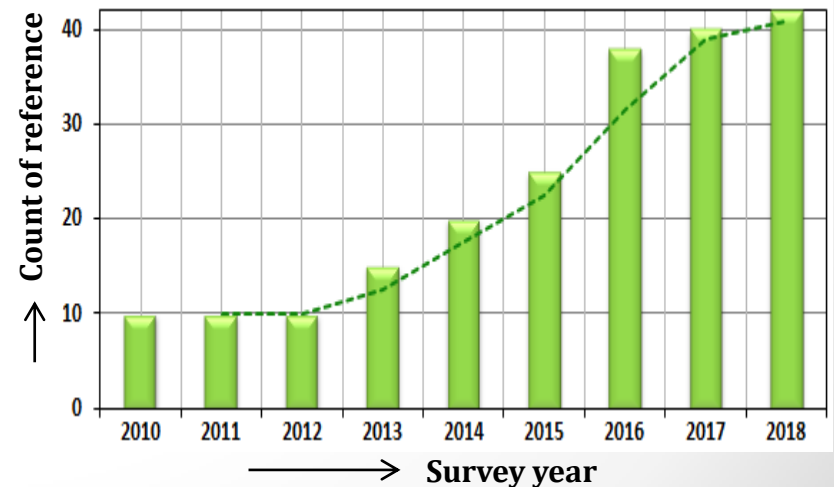

Supplement: 11390_2020_9349_MOESM1_ESM.pdf [file 11390_2020_9349_MOESM1_ESM.pdf]
